# Supplementary material for: The cellular architecture of memory modules in Drosophila supports stochastic input integration
Source: eLife. 2023 Mar 14;12:e77578. doi: 10.7554/eLife.77578 (PMC10069864; doi:10.7554/eLife.77578)
Supplement: Figure 2—source data 1. [file elife-77578-fig2-data1.xlsx]

## Sheet: Tabelle1
Figure 2_source data 1
Section	Length [µm]	Diameter [µm]	Number of Segments
Neurite 1 (red)	75.89	1.14	27
Neurite 2 (orange)	151.58	0.63	39
Branch 1 (blue)	65.98	0.69	17
Branch 2 (violett)	480.32	0.80	363
Branch 3 (brown)	129.02	0.79	97
Soma (black)	6.45	6.45	1
Table shows the values for the individual section of the computational model.
Number of segments corresponds to NEURON´s "nseg" variable for the respective section.
