# Supplementary material for: The cellular architecture of memory modules in Drosophila supports stochastic input integration
Source: eLife. 2023 Mar 14;12:e77578. doi: 10.7554/eLife.77578 (PMC10069864; doi:10.7554/eLife.77578)
Supplement: Table 1—source data 1. [file elife-77578-table1-data1.xlsx]

## Sheet: Tabelle1
Table 1 - source data 1
Sample	Vm[mV]	τm[ms]	Cm[pF]	Cspec[μF/cm2]	Cpass[S/cm2]
Cell 1	-56.3	16.41	22.8	0.370	0.0000225
Cell 2	-61.5	17.43	12.07	0.196	0.0000112
Cell 3	-56.2	24.58	21.60	0.350	0.0000129
Cell 4	-62.4	9.51	9.37	0.152	0.0000160
Mean	-60.6	14.48	13.95	0.226	0.0000156
SD	2.9	3.52	6.01	0.098	0.0000050
SEM	1.3	1.57	2.69	0.044	0.0000022
Summary of passive membrane properties of MBON-α3, calculated from electrophysiological measurements from four neurons marked by cytoplasmic EGFP.
From left to right: resting membrane potential (Vm) in mV, membrane time constant (τm) in ms, capacitance of the membrane (Cm) in pF, specific capacitance (Cspec) in μF/cm2 and passive membrane conductance (Cpass) in S/cm2.
