# Supplementary figures and images for: The cellular architecture of memory modules in Drosophila supports stochastic input integration
Source: eLife journal article supplement (doi:10.7554/elife.77578), 2023-03-14

**A**

circuit model

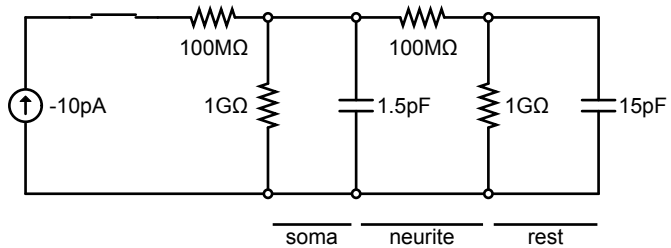**B**

modeled voltage

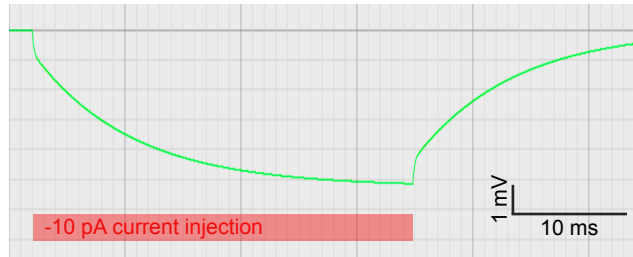**C**

cell 1

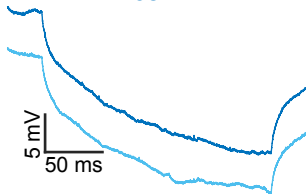

Supplement: supp [file elife-77578-supp-v1.zip]

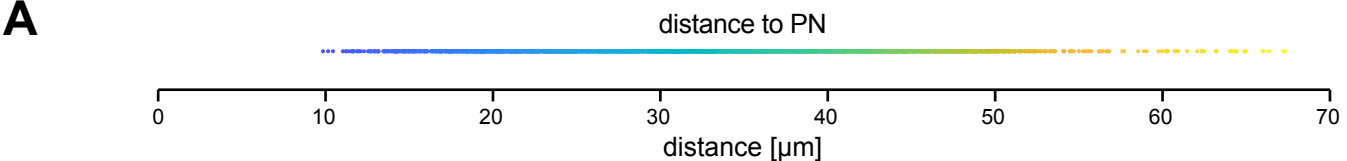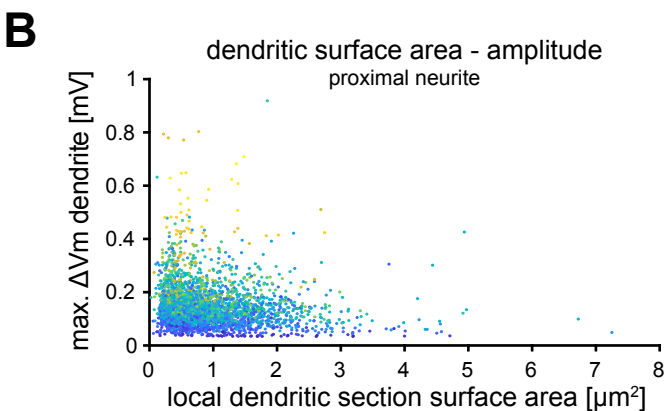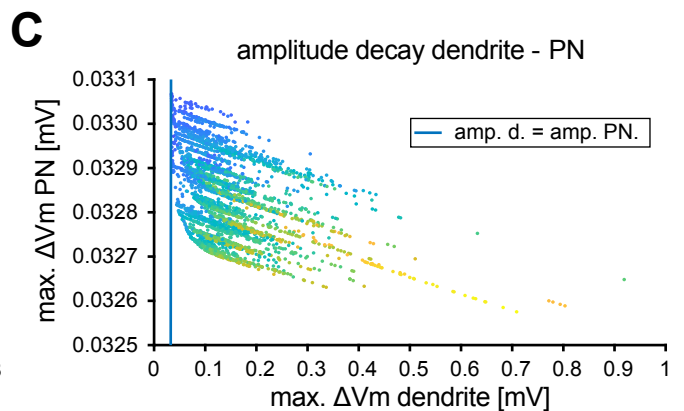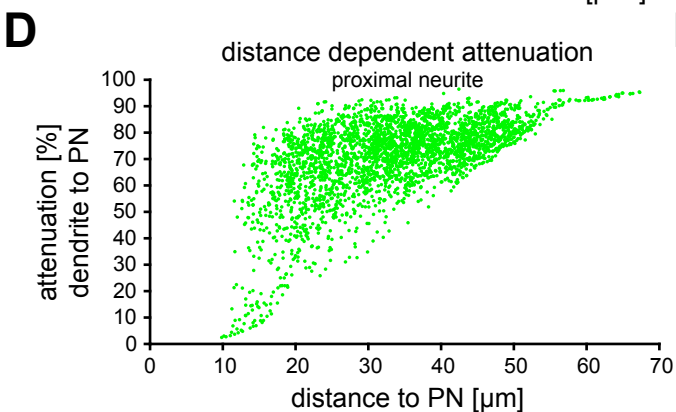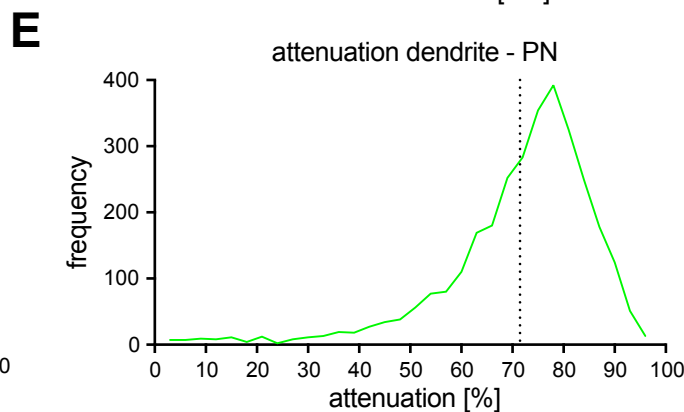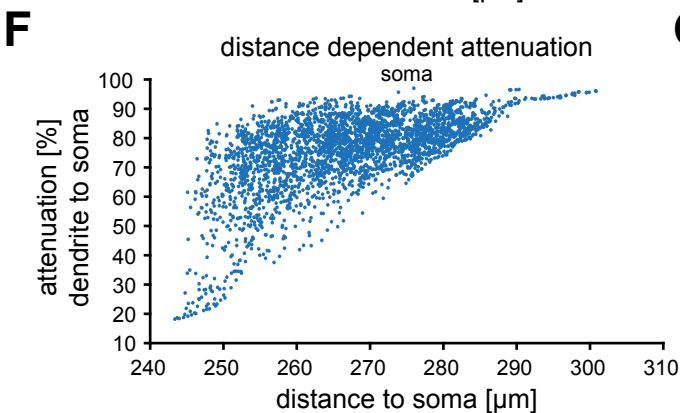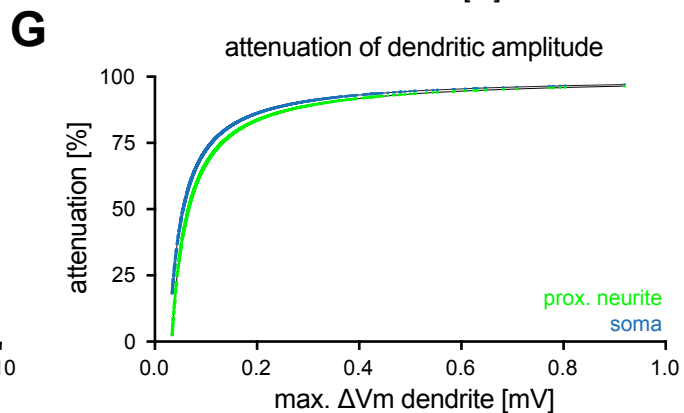

Supplement: supp [file elife-77578-supp-v1.zip]

**A**

cell 2

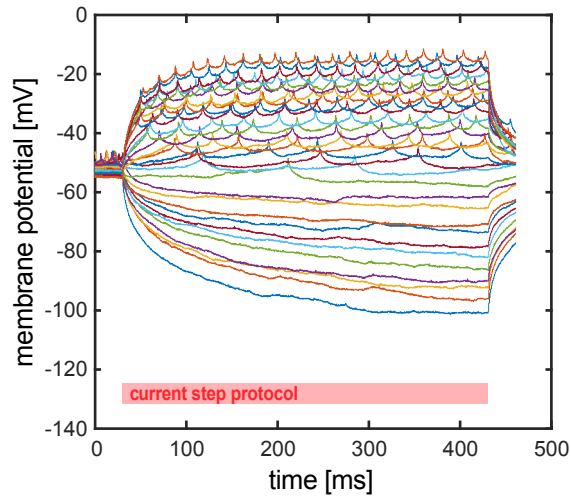**B**

cell 3

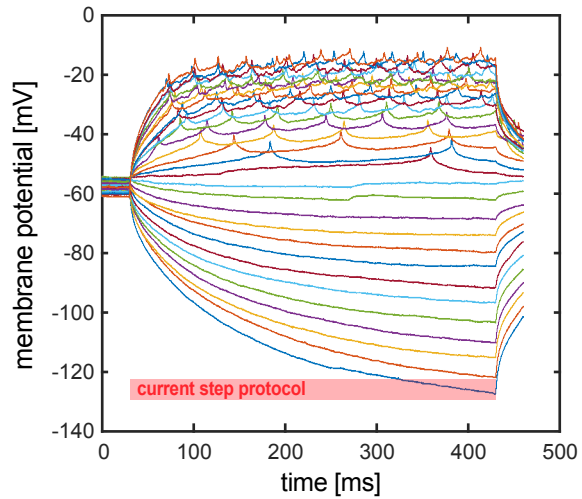**C**

spike frequency

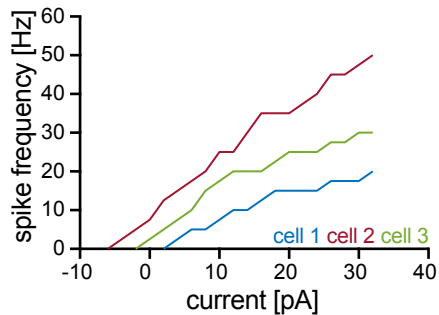**D**

spike amplitude

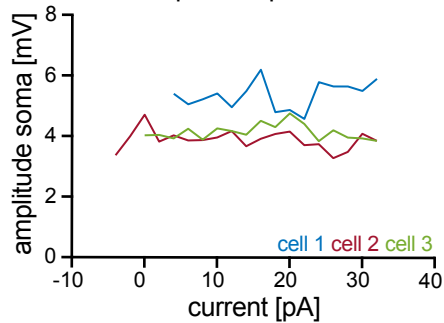**E**

membrane potential

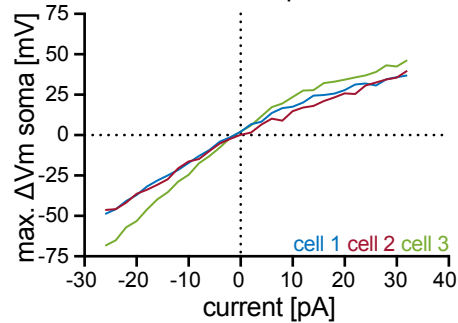

Supplement: supp [file elife-77578-supp-v1.zip]

**A**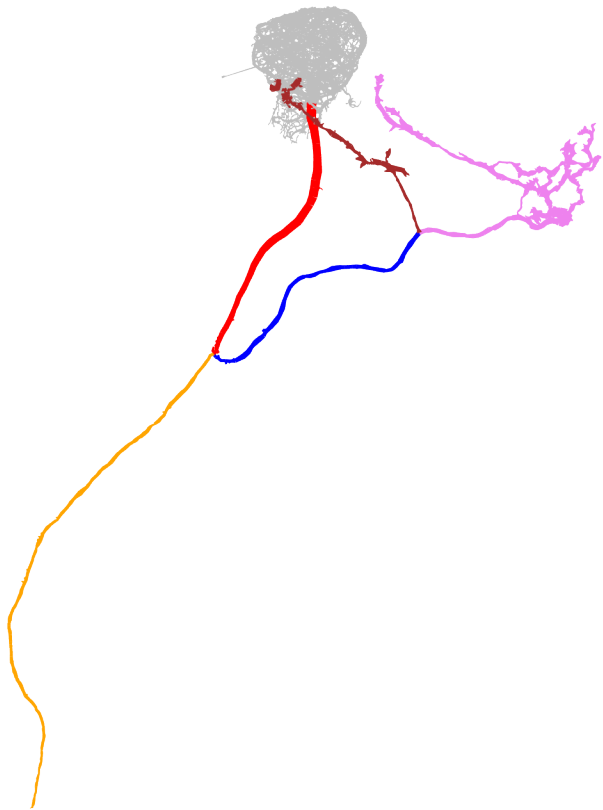**B**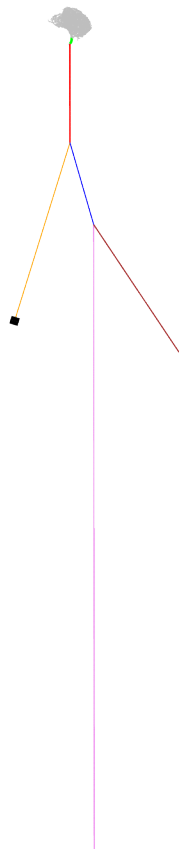

Supplement: supp [file elife-77578-supp-v1.zip]

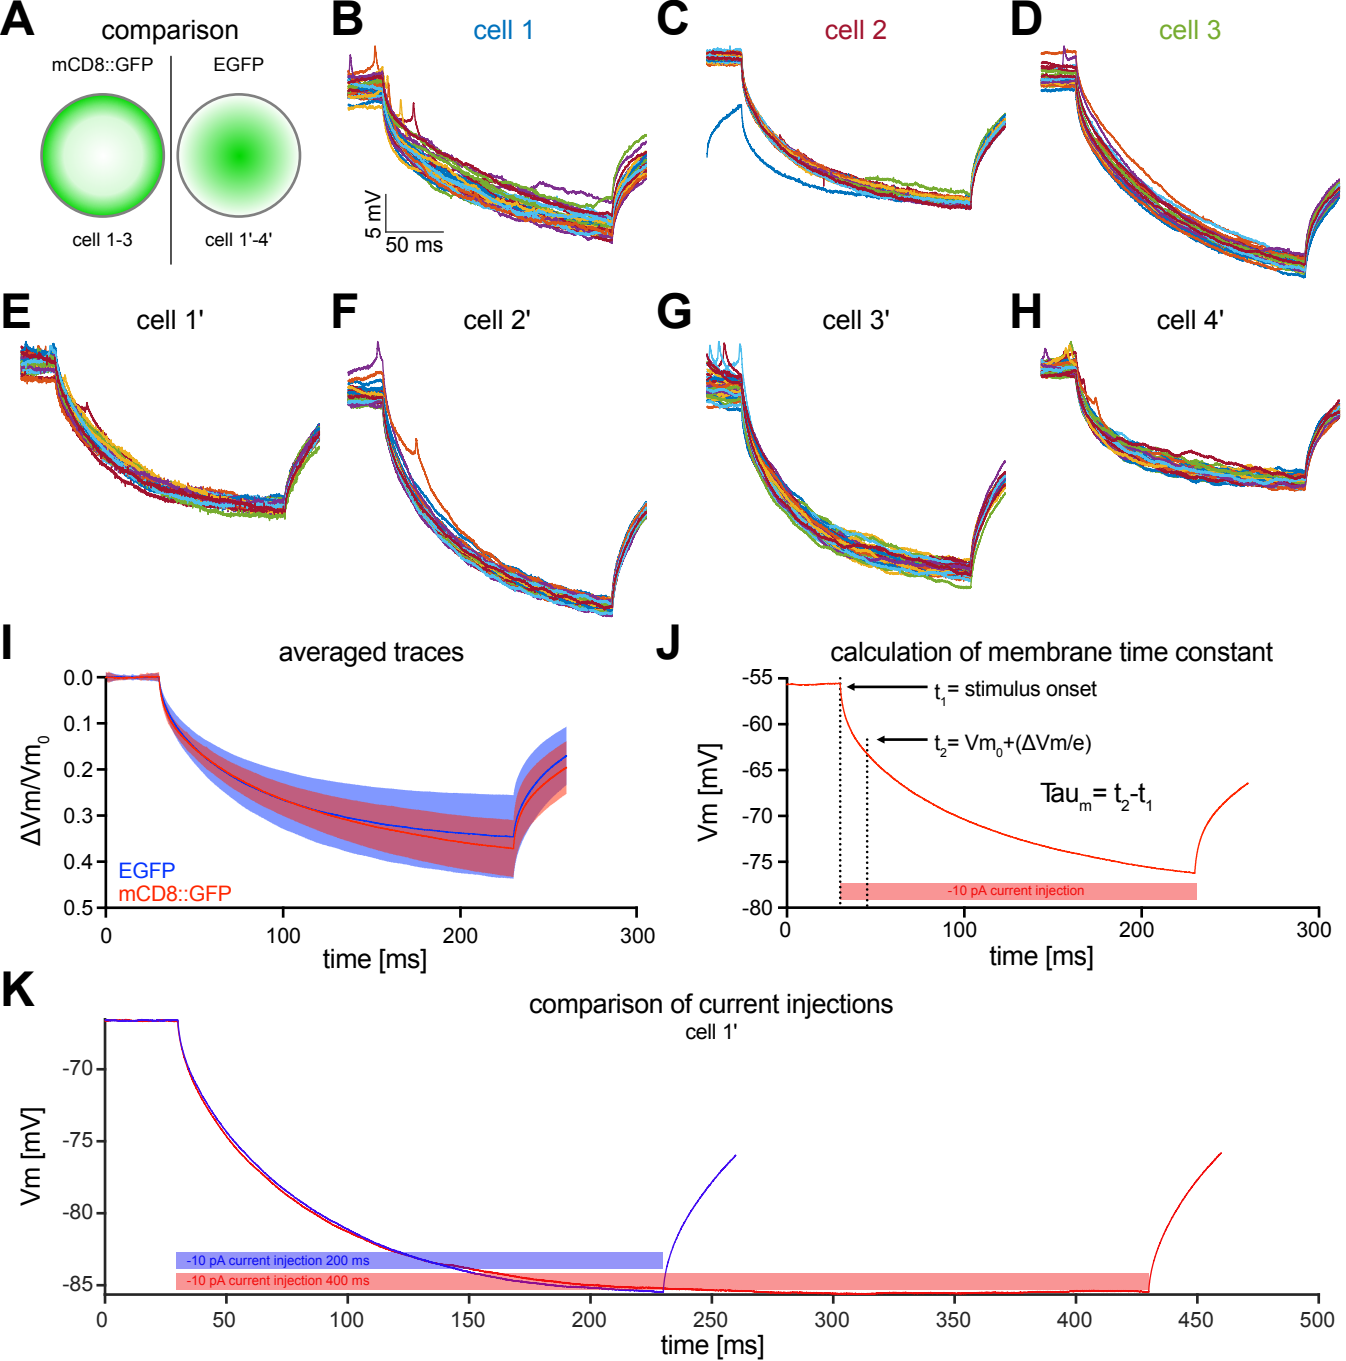

Supplement: supp [file elife-77578-supp-v1.zip]
